# Supplementary material
Source: Springer Nature journal article supplement (https://www.springermedizin.de/resource/supplementary/12985_2011_1627_MOESM2_ESM.pdf/9610228)

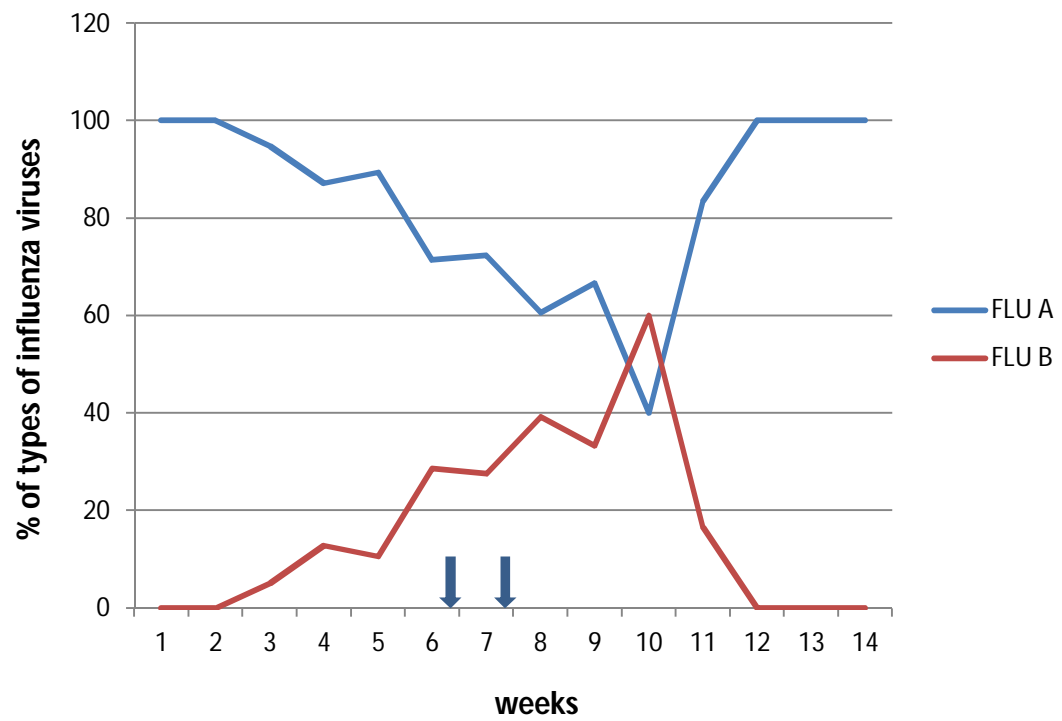

Figure 2

Supplement: MOESM2 [file 9610228]
